# Supplementary material for: Effective surveyed area and its role in statistical landslide susceptibility assessments
Source: Copernicus journal article supplement (doi:10.5194/nhess-18-2455-2018), 2018-09-14
Supplement: Supplementary file 1 [file nhess-18-2455-2018-supplement.zip]

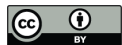

## *Supplement of*

# **Effective surveyed area and its role in statistical landslide susceptibility assessments**

**Txomin Bornaetxea et al.**

*Correspondence to:* Txomin Bornaetxea ([txomin.bornaetxea@ehu.eus](mailto:txomin.bornaetxea@ehu.eus))

- [nhess-18-2455-2018-supplement-title-page.pdf](#)
- [r.survey](#)
  - [README.txt](#)
  - [r.survey.py](#)

The copyright of individual parts of the supplement might differ from the CC BY 4.0 License.
